# Supplementary material for: Focal opening of the neuronal plasma membrane by shock-induced bubble collapse for drug delivery: a coarse-grained molecular dynamics simulation
Source: Royal Society of Chemistry journal article supplement (doi:10.1039/d2cp03442e), 2022-01-01
Supplement: d2cp03442e1.pdf [file d2cp03442e1.pdf]

*Supporting Information for*

**Focal Opening of the Neuronal Plasma Membrane by  
Shock-induced Bubble Collapse for Drug Delivery. A  
Coarse-Grained Molecular Dynamic Simulation**

*Mi Zhou,<sup>a,b</sup> Tong Wei,<sup>b</sup> Lingzhi Gu,<sup>b</sup> Hong Yang,<sup>b</sup> Ming Li,<sup>b</sup> and Yang Zhou<sup>b,\*</sup>*

<sup>a</sup> School of Materials Science & Engineering, Beijing Institute of Technology, 100081  
Beijing, China;

<sup>b</sup> Institute of Chemical Materials, Chinese Academy of Engineering and Physics,  
621900 Mianyang, China.

AUTHOR INFORMATION

**Corresponding Author**

\*Yang Zhou. E-mail: zhouy@caep.cn

## Captions

**Table S1.** The composition of plasma membrane.

**Figure S1.** Distribution of three characteristic components (SM lipid are red, Cere are orange, CHOL are blue, other lipid molecules are silver).

**Figure S2.** Illustration of the momentum mirror boundary condition.

**Figure S3.** Time dependence of the pressure normal to the membrane surface (pressure profile at the membrane position) with  $u_p = 0.8 \text{ km}\cdot\text{s}^{-1}$ . The gray area represents pressure space generated by bubble collapse. The “a” is the pressure of the shock wave front passing through the membrane interface, and “b” represents the jet begins to generate pressure on the membrane after the bubble collapses.

**Table S2.** Details of all simulation systems in this work.

**Table S3.** The pore area ( $\text{nm}^2$ ) of different SM content at the  $u_p = 0.6 \text{ km/s}$  and  $D = 40\text{nm}$ .

**Table S4.** The pore area ( $\text{nm}^2$ ) of PM at different bubble diameters (nm) and shock velocity (km/s).

**Table S1.** The composition of plasma membrane.

| Composition name                       | Number of lipids |               | Total        |
|----------------------------------------|------------------|---------------|--------------|
|                                        | Outer leaflet    | Inner leaflet |              |
| Phosphatidylcholine (PC)               | 2412             | 1288          | 3700         |
| Phosphatidylethanolamine (PE)          | 1093             | 2017          | 3110         |
| Sphingomyelin (SM)                     | 892              | 219           | 1111         |
| Phosphatidylserine (PS)                | 0                | 930           | 930          |
| Glycolipid (GM1)                       | 135              | 0             | 135          |
| Glycolipid (GM3)                       | 135              | 0             | 135          |
| Cerebrosides (CERE)                    | 742              | 0             | 742          |
| Phosphatidylinositol (PI)              | 0                | 484           | 484          |
| Phosphatidic acid (PA)                 | 0                | 38            | 38           |
| Phosphatidylinositol phosphates (PIPs) | 0                | 132           | 132          |
| Ceramide (CER)                         | 56               | 55            | 111          |
| Lysophosphatidylcholine (LPC)          | 30               | 15            | 45           |
| Lysophosphatidylethanolamine (LPE)     | 15               | 30            | 45           |
| Diacylglycerol (DAG)                   | 38               | 38            | 76           |
| Cholesterol (CHOL)                     | 4431             | 4222          | 8653         |
| <b>Total lipids</b>                    | <b>9979</b>      | <b>9468</b>   | <b>19435</b> |

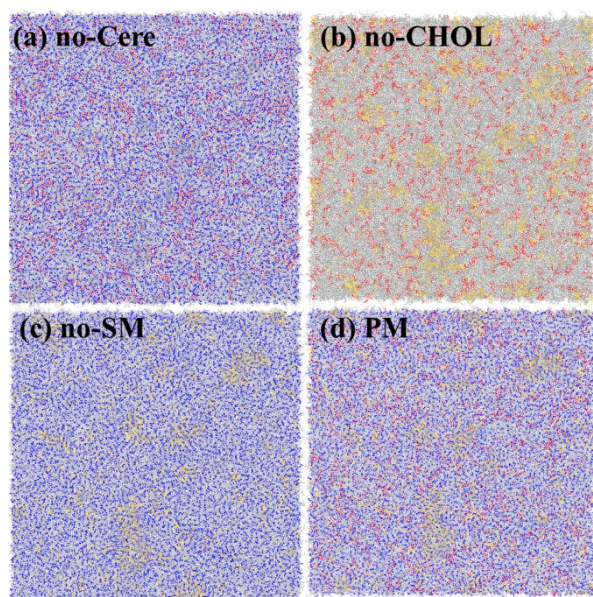

**Figure S1.** Distribution of three characteristic components (SM lipid are red, Cere are orange, CHOL are blue, other lipid molecules are silver).

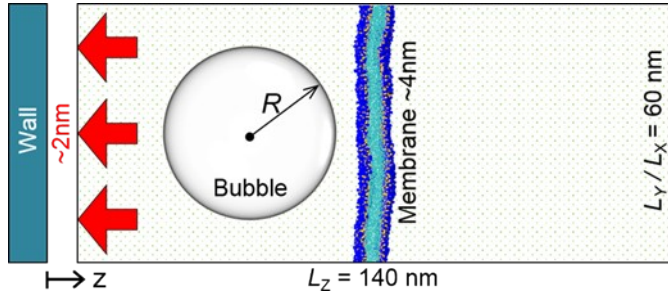

**Figure S2.** Illustration of the momentum mirror boundary condition.

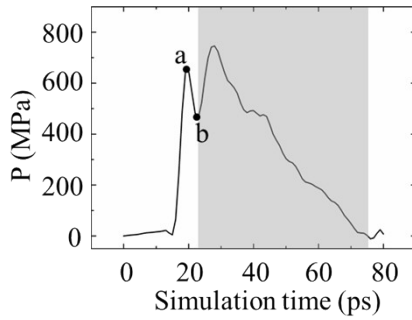

**Figure S3.** Time dependence of the pressure normal to the membrane surface (pressure profile at the membrane position) with  $u_p = 0.8 \text{ km}\cdot\text{s}^{-1}$ . The gray area represents pressure space generated by bubble collapse. The “a” is the pressure of the shock wave front passing through the membrane interface, and “b” represents the jet begins to generate pressure on the membrane after the bubble collapses.

**Table S2.** Details of all simulation systems in this work.

| Systems | Bubble diameter ( $D$ ) | Shock velocity (km/s) | Shock simulation time (ps) |
|---------|-------------------------|-----------------------|----------------------------|
| PM      | 20                      | 0.7                   | 100                        |
|         | 20                      | 0.8                   | 100                        |
|         | 20                      | 0.9                   | 100                        |
|         | 20                      | 1.0                   | 100                        |
|         | 20                      | 1.1                   | 100                        |
|         | 40                      | 0.6                   | 150                        |
|         | 40                      | 0.7                   | 100                        |
|         | 40                      | 0.8                   | 100                        |
|         | 40                      | 0.9                   | 100                        |
|         | 40                      | 1.0                   | 100                        |
|         | 40                      | 1.1                   | 100                        |
|         | 40                      | 1.2                   | 100                        |
|         | 50                      | 0.7                   | 100                        |
|         | 50                      | 0.8                   | 100                        |

---

|                |    |     |     |
|----------------|----|-----|-----|
|                | 50 | 0.9 | 100 |
|                | 50 | 1.0 | 100 |
|                | 50 | 1.1 | 100 |
| <b>no-CERE</b> | 20 | 0.7 | 100 |
|                | 20 | 0.8 | 100 |
|                | 20 | 0.9 | 100 |
|                | 20 | 1.0 | 100 |
|                | 20 | 1.1 | 100 |
|                | 40 | 0.6 | 150 |
|                | 40 | 0.7 | 100 |
|                | 40 | 0.8 | 100 |
|                | 40 | 0.9 | 100 |
|                | 40 | 1.0 | 100 |
|                | 40 | 1.1 | 100 |
|                | 40 | 1.2 | 100 |
|                | 50 | 0.7 | 100 |
|                | 50 | 0.8 | 100 |
|                | 50 | 0.9 | 100 |
|                | 50 | 1.0 | 100 |
|                | 50 | 1.1 | 100 |
| <b>no-CHOL</b> | 20 | 0.7 | 100 |
|                | 20 | 0.8 | 100 |
|                | 20 | 0.9 | 100 |
|                | 20 | 1.0 | 100 |
|                | 20 | 1.1 | 100 |
|                | 40 | 0.6 | 150 |
|                | 40 | 0.7 | 100 |
|                | 40 | 0.8 | 100 |
|                | 40 | 0.9 | 100 |
|                | 40 | 1.0 | 100 |
|                | 40 | 1.1 | 100 |
|                | 40 | 1.2 | 100 |
|                | 50 | 0.7 | 100 |
|                | 50 | 0.8 | 100 |
|                | 50 | 0.9 | 100 |
|                | 50 | 1.0 | 100 |
|                | 50 | 1.1 | 100 |
| <b>no-SM</b>   | 20 | 0.7 | 100 |
|                | 20 | 0.8 | 100 |
|                | 20 | 0.9 | 100 |
|                | 20 | 1.0 | 100 |
|                | 20 | 1.1 | 100 |
|                | 40 | 0.6 | 150 |
|                | 40 | 0.7 | 100 |

---

|                      |    |     |     |
|----------------------|----|-----|-----|
|                      | 40 | 0.8 | 100 |
|                      | 40 | 0.9 | 100 |
|                      | 40 | 1.0 | 100 |
|                      | 40 | 1.1 | 100 |
|                      | 40 | 1.2 | 100 |
|                      | 50 | 0.7 | 100 |
|                      | 50 | 0.8 | 100 |
|                      | 50 | 0.9 | 100 |
|                      | 50 | 1.0 | 100 |
|                      | 50 | 1.1 | 100 |
| <b>SM:DOPC (1:9)</b> | 40 | 0.6 | 150 |
| <b>SM:DOPC (3:7)</b> | 40 | 0.6 | 150 |

**Table S3.** The pore area (nm<sup>2</sup>) of different SM content at the  $u_p = 0.6\text{km/s}$  and  $D = 40\text{nm}$ .

| Models | Area at 60ps | Area at 80ps | Area at 100ps |
|--------|--------------|--------------|---------------|
| 10%SM  | 0.0          | 3            | 7.75          |
| 30%SM  | 0.25         | 4            | 13            |

**Table S4.** The pore area (nm<sup>2</sup>) of PM at different bubble diameters (nm) and particle velocity ( $u_p$ , km/s).

| $D \backslash u_p$ | 0.6  | 0.7    | 0.8 | 0.9    | 1.0    | 1.1    | 1.2 |
|--------------------|------|--------|-----|--------|--------|--------|-----|
| 20                 | -    | 18     | 114 | 86.25  | 97.75  | 100.25 | -   |
| 40                 | 5.5  | 296.75 | 745 | 498    | 409.25 | 317    | 299 |
| 50                 | 18.5 | 318.75 | 795 | 714.75 | 464    | 354.5  | -   |
